# Supplementary material for: The effects of single versus multiple training sessions on the motor learning of two Krav Maga strike techniques, in women
Source: PeerJ. 2020 Feb 13;8:e8525. doi: 10.7717/peerj.8525 (PMC7024584; doi:10.7717/peerj.8525)
Supplement: Supplemental Information 1 [file peerj-08-8525-s001.xlsx]

## Sheet: Data
Participant	Group	Timepoint	Trial (Punch)	Trial (Kick)	Punch Checkpoint 1 Shoulder Abduction Angle (degrees)	SQRT Punch Checkpoint 1 Shoulder Abduction Angle (degrees)	Punch Checkpoint 2 fist Recoil velocity (m/s)	Log Punch Checkpoint 2 fist Recoil velocity (m/s)	Punch Checkpoint 3 Anterior-Posterior GRF (%BW)	SQRT Punch Checkpoint 3 Anterior-Posterior GRF (%BW)	Peak Punch Strike Velocity (m/s)	Punch Peak Impact Force (%BW)	Kick Checkpoint 1 Thigh-Thorax flexion angle (degrees)	Kick Checkpoint 2 Knee Extension Angle (degrees)	Kick Checkpoint 3 Anterior-Posterior GRF (%BW)	Kick Peak Strike Velocity (m/s)	Kick Peak Impact Force (%BW)
MT1	MT	PreAQ	1	1	5.577	2.36157	-2.12116	0.326573	9.51465	3.08458	5.35602	90.1059	-63.2363	-17.1859	16.1755	4.95846	184.623
MT1	MT	PreAQ	2	2	27.1192	5.20761	-2.44334	0.387983	11.7424	3.42672	5.22937	85.0001	-58.2338	-27.5442	13.0352	5.03489	198.898
MT1	MT	PreAQ	3	3	22.6277	4.75686	-2.31404	0.364371	7.98587	2.82593	5.07224	76.1347	-56.6164	-15.7991	16.367	5.26347	223.677
MT1	MT	PreAQ	4	4	22.8772	4.78301	-2.14225	0.33087	9.23873	3.03953	5.25931	83.2343	-69.477	-15.2751	17.5701	5.84761	158.28
MT1	MT	PreAQ	5	5	15.3316	3.91556	-2.30661	0.362974	10.8134	3.28838	5.71171	104.37	-64.2032	-19.9565	14.8412	4.88916	186.307
MT1	MT	PostAQ	1	1	23.5639	4.85427	-2.4219	0.384157	13.9733	3.73809	5.16093	60.2524	-45.6038	-23.288	37.098	5.48296	256.496
MT1	MT	PostAQ	2	2	21.9338	4.68335	-2.72331	0.435096	20.0956	4.48282	5.39813	94.2838	-34.5678	-31.2016	39.2072	5.37817	291.239
MT1	MT	PostAQ	3	3	23.9728	4.8962	-2.36466	0.373768	22.4131	4.73425	5.37835	85.6851	-35.4585	-18.549	41.9453	5.57156	294.236
MT1	MT	PostAQ	4	4	11.9723	3.4601	-2.48585	0.395475	23.7548	4.87389	5.68872	74.0456	-44.7746	-20.4464	37.2626	5.83569	227.981
MT1	MT	PostAQ	5	5	29.8158	5.46039	-3.32154	0.521339	26.612	5.15868	6.04347	94.6108	-32.5387	-30.0185	33.2824	5.25985	307.561
MT1	MT	RT1	1	1	29.1031	5.39473	-2.87689	0.458923	17.5803	4.19288	5.59811	76.1033	-45.3742	-20.1739	38.7502	5.6292	224.949
MT1	MT	RT1	2	2	21.4792	4.63456	-3.11009	0.492773	16.8679	4.10705	5.18776	89.663	-41.9522	-18.5903	33.3063	5.49735	254.929
MT1	MT	RT1	3	3	35.0637	5.92146	-2.84321	0.453809	27.9015	5.28218	5.41336	71.7796	-33.7802	-25.9585	34.002	4.98696	307.277
MT1	MT	RT1	4	4	32.7996	5.72709	-2.77334	0.443003	26.2929	5.12766	5.64436	81.468	-50.0872	-19.0145	21.0682	5.3507	242.152
MT1	MT	RT1	5	5	19.433	4.40829	-2.22774	0.347864	26.3754	5.1357	5.5567	67.0053	-54.5025	-16.5806	22.9386	6.5153	213.869
MT1	MT	RT2	1	1	33.604	5.7969	-2.6879	0.429413	20.0303	4.47552	5.29432	80.3045	-21.4899	-23.7471	35.4745	6.39821	298.53
MT1	MT	RT2	2	2	26.1322	5.11197	-2.19573	0.341579	25.5852	5.05818	5.5241	71.0569	-17.2941	-22.4505	38.1795	6.5368	351.385
MT1	MT	RT2	3	3	25.8793	5.08717	-1.99091	0.299053	17.1269	4.13847	5.35209	71.8837	-23.3496	-16.3983	30.6254	6.85006	299.99
MT1	MT	RT2	4	4	35.9596	5.99664	-2.14268	0.330957	26.3941	5.13752	5.08318	67.6756	-27.103	-14.3003	36.0299	6.99594	314.312
MT1	MT	RT2	5	5	31.4322	5.60644	-2.23406	0.349094	26.1657	5.11524	5.5598	83.7335	-26.1561	-16.3688	33.0916	5.89907	316.453
MT2	MT	PreAQ	1	1	26.5293	5.15066	-2.83314	0.452268	13.4181	3.66308	4.73311	86.7956	-54.209	-36.7089	25.5315	4.40567	174.892
MT2	MT	PreAQ	2	2	20.4197	4.51881	-2.46962	0.39263	13.7169	3.70363	4.61048	85.8751	-55.9372	-27.0766	28.4136	5.17793	187.898
MT2	MT	PreAQ	3	3	26.6462	5.162	-2.2862	0.359113	17.0204	4.12558	4.40967	99.6229	-50.7509	-33.2119	29.09	5.04575	171.032
MT2	MT	PreAQ	4	4	22.4248	4.73548	-2.12712	0.327791	16.1031	4.01286	4.27229	90.2005	-50.8412	-44.2503	32.9018	4.9974	182.291
MT2	MT	PreAQ	5	5	32.2643	5.68017	-2.26399	0.354875	18.435	4.2936	4.40054	103.34	-60.2514	-30.2946	29.2444	5.70285	176.735
MT2	MT	PostAQ	1	1	15.2943	3.9108	-2.88075	0.459505	14.4556	3.80205	3.4606	81.4743	-49.6643	-31.107	34.0431	5.21518	242.81
MT2	MT	PostAQ	2	2	32.777	5.72512	-2.09617	0.321427	19.259	4.38851	3.94246	92.8328	-42.6126	-17.8879	30.3579	5.15062	251.775
MT2	MT	PostAQ	3	3	23.0475	4.80078	-2.07575	0.317175	25.512	5.05095	3.97525	93.9383	-45.8345	-38.948	34.3918	5.34029	245.826
MT2	MT	PostAQ	4	4	29.7806	5.45716	-2.33143	0.367622	17.3874	4.16982	4.16898	96.9686	-50.5988	-21.9081	36.3127	5.50874	287.326
MT2	MT	PostAQ	5	5	30.8645	5.55558	-2.72191	0.434874	16.0103	4.00129	4.37873	106.804	-43.504	-17.0393	37.4899	5.73001	304.927
MT2	MT	RT1	1	1	29.505	5.43185	-2.8	0.447158	19.2073	4.38261	.	126.189	-43.1792	-5.14323	32.5716	6.06994	351.304
MT2	MT	RT1	2	2	27.5375	5.24762	-2.38434	0.377369	30.733	5.54374	4.21281	123.728	-44.9581	-7.03077	37.1571	5.7681	326.57
MT2	MT	RT1	3	3	29.9721	5.47468	-3.10467	0.492015	30.9733	5.56536	4.27879	135.362	-42.491	-12.4238	37.2561	5.66073	342.852
MT2	MT	RT1	4	4	23.4009	4.83745	-2.59326	0.413845	33.0402	5.74806	3.99627	138.41	-43.2654	-17.9413	37.9872	6.26471	341.761
MT2	MT	RT1	5	5	23.6345	4.86153	-2.50979	0.399638	31.1829	5.58417	4.0283	131.969	-44.7789	-12.5197	37.6476	6.31152	342.435
MT2	MT	RT2	1	1	22.0467	4.69539	-2.66573	0.425815	26.8285	5.17963	3.64309	125.946	-44.2321	-13.5394	38.3848	6.43388	335.32
MT2	MT	RT2	2	2	20.4589	4.52316	-2.12376	0.327104	20.8485	4.56601	3.8571	118.044	-46.0229	-10.5647	43.8408	6.28651	296.211
MT2	MT	RT2	3	3	18.8712	4.3441	-2.4685	0.392433	30.6105	5.53268	4.12242	126.202	-44.9474	-12.4147	45.4592	6.61211	347.564
MT2	MT	RT2	4	4	17.2834	4.15733	-2.22981	0.348268	25.2622	5.02615	4.10818	127.857	-44.5579	-15.5906	45.9696	6.27985	337.158
MT2	MT	RT2	5	5	24.059	4.905	-2.44049	0.387478	25.2485	5.02479	4.05795	125.513	-41.3213	-17.0693	45.7765	6.52283	313.013
MT3	MT	PreAQ	1	1	12.8329	3.5823	-1.167	0.0670709	12.7635	3.5726	4.55056	82.7357	-46.0739	-38.5993	16.8561	3.84392	142.264
MT3	MT	PreAQ	2	2	11.09	3.33016	-1.123	0.0503798	14.6995	3.83399	5.04925	92.2554	-42.3305	-37.7321	16.3642	3.76769	161.923
MT3	MT	PreAQ	3	3	6.19351	2.48868	-1.683	0.226084	17.1918	4.1463	4.66164	77.4576	-35.2842	-30.3381	18.3156	4.28422	199.921
MT3	MT	PreAQ	4	4	4.24221	2.05966	-1.634	0.213252	13.3759	3.65731	4.5675	79.4914	-33.0652	-26.9123	15.5686	3.33408	201.221
MT3	MT	PreAQ	5	5	13.8608	3.72301	-1.583	0.199481	14.6191	3.82349	4.51652	79.3832	-37.8625	-27.9412	14.2179	3.47173	189.857
MT3	MT	PostAQ	1	1	31.3183	5.59628	-3.3336	0.522913	22.3608	4.72872	.	90.6901	-26.4115	-40.7664	21.1317	4.36723	191.605
MT3	MT	PostAQ	2	2	29.1923	5.40299	-2.85958	0.456302	22.0959	4.70062	4.52115	92.4269	-20.0288	-28.1452	20.3884	4.32827	277.213
MT3	MT	PostAQ	3	3	21.818	4.67097	-3.22701	0.5088	19.9597	4.46762	4.2291	72.4872	-29.8507	-24.7908	21.1866	4.31774	273.172
MT3	MT	PostAQ	4	4	18.8135	4.33746	-2.29409	0.36061	19.3261	4.39614	4.72453	89.3189	-31.1673	-33.2409	22.9093	4.23002	248.641
MT3	MT	PostAQ	5	5	19.128	4.37355	-2.05559	0.312935	25.4738	5.04716	4.80426	79.0698	-27.3711	-25.8783	15.9563	4.49696	211.269
MT3	MT	RT1	1	1	34.0245	5.83305	-4.37496	0.640974	19.287	4.39169	4.74701	78.8795	-42.1946	-0.220744	24.5111	4.87739	244.829
MT3	MT	RT1	2	2	33.7219	5.80706	-4.96504	0.695923	17.2565	4.1541	5.0183	86.253	-43.535	-14.2356	30.472	5.78023	244.147
MT3	MT	RT1	3	3	42.2101	6.49693	-4.64523	0.667008	18.1758	4.26331	4.82224	72.1539	-31.8773	-7.85441	27.4338	4.78193	281.155
MT3	MT	RT1	4	4	36.3583	6.02979	-3.78649	0.578237	18.4225	4.29215	4.82762	89.356	-38.539	-5.05208	24.502	5.28183	264.14
MT3	MT	RT1	5	5	41.0086	6.40379	-4.3487	0.63836	18.3146	4.27956	4.63523	69.0175	-33.9966	-11.8796	30.9765	4.6089	225.082
MT3	MT	RT2	1	1	27.0551	5.20146	-4.42493	0.645906	17.0165	4.12511	4.76028	79.7792	-26.7123	-18.2293	30.9832	4.72116	232.992
MT3	MT	RT2	2	2	20.9798	4.58038	-3.89573	0.590589	16.1364	4.01701	4.57188	71.176	-41.8679	-7.19899	28.5191	4.87692	226.816
MT3	MT	RT2	3	3	26.938	5.19018	-4.00868	0.603002	14.144	3.76085	4.37361	71.47	-36.0977	-13.9324	28.5869	5.1922	239.074
MT3	MT	RT2	4	4	15.3216	3.91428	-4.04399	0.60681	16.1354	4.01689	4.26535	71.4784	-46.023	-16.4733	26.5293	5.16622	212.608
MT3	MT	RT2	5	5	20.8996	4.5716	-3.42087	0.534136	13.0384	3.61088	4.65398	82.4693	-36.9945	-15.0629	25.402	5.22496	254.13
MT4	MT	PreAQ	1	1	11.6114	3.40755	-1.81665	0.259272	9.23881	3.03954	3.21527	52.9137	-64.9122	-43.4535	15.441	4.82229	64.8852
MT4	MT	PreAQ	2	2	17.0058	4.12381	-1.71007	0.233014	11.4047	3.37709	3.39573	51.2926	-60.3793	-37.1697	21.1808	4.81061	77.9343
MT4	MT	PreAQ	3	3	17.4573	4.1782	-1.91204	0.281497	10.0671	3.17286	3.48791	47.9726	-61.9137	-39.5296	12.351	4.43767	75.1474
MT4	MT	PreAQ	4	4	17.4372	4.17579	-1.99727	0.300436	10.4614	3.23441	3.51371	47.9988	-66.0606	-44.4578	15.8759	4.66219	89.9784
MT4	MT	PreAQ	5	5	23.6756	4.86575	-1.86458	0.270581	11.2562	3.35502	3.83643	52.1812	-66.3701	-46.5423	15.2516	4.57255	70.4439
MT4	MT	PostAQ	1	1	23.1	4.80625	-2.38404	0.377314	14.1637	3.76347	4.38268	66.7607	-55.9266	-22.1286	28.5529	5.75193	165.125
MT4	MT	PostAQ	2	2	19.6307	4.43065	-2.6396	0.421538	12.765	3.57281	4.57935	63.7102	-62.5223	-22.1619	31.0839	6.03207	165.031
MT4	MT	PostAQ	3	3	15.805	3.97555	-2.46431	0.391695	11.567	3.40102	4.51099	61.7602	-62.6099	-31.3252	29.0533	6.04892	159.339
MT4	MT	PostAQ	4	4	18.2178	4.26823	-2.59201	0.413636	13.2517	3.64029	4.3546	71.5653	-64.5681	-30.1423	35.4251	6.06729	146.454
MT4	MT	PostAQ	5	5	18.3521	4.28394	-2.25803	0.35373	11.5391	3.39693	4.26394	57.4347	-62.1043	-32.0274	29.5449	5.8926	152.027
MT4	MT	RT1	1	1	36.8833	6.07316	-1.55274	0.191099	11.5741	3.40207	4.06074	73.6332	-50.5007	-2.96682	30.0451	4.63135	129.832
MT4	MT	RT1	2	2	19.7904	4.44864	-1.82683	0.261697	15.4426	3.92971	4.01762	76.7428	-52.8412	-12.7224	31.7099	4.47345	189.862
MT4	MT	RT1	3	3	33.9216	5.82423	-2.04054	0.309746	14.7251	3.83733	3.5448	82.3872	-51.8896	1.37675	31.3773	4.78747	156.308
MT4	MT	RT1	4	4	34.0015	5.83108	-2.37343	0.375377	13.5586	3.6822	3.96362	75.1384	-45.578	-11.0528	26.1256	4.31291	196.421
MT4	MT	RT1	5	5	35.4639	5.95516	-2.24226	0.350685	13.1495	3.62623	3.88767	73.5288	-44.0125	-8.6729	26.6291	4.39337	152.112
MT4	MT	RT2	1	1	24.425	4.94217	-2.39115	0.378607	11.681	3.41776	4.51175	71.5016	-55.9421	-36.3697	38.0742	5.21834	182.055
MT4	MT	RT2	2	2	19.117	4.3723	-2.47634	0.393809	13.8545	3.72216	4.50741	72.8863	-58.9979	-41.1823	38.8442	5.69867	153.338
MT4	MT	RT2	3	3	19.0261	4.3619	-2.60366	0.415585	13.2934	3.64601	4.65346	67.4765	-60.8856	-38.8611	39.5278	6.53017	156.592
MT4	MT	RT2	4	4	13.6577	3.69564	-2.55901	0.408071	11.8869	3.44774	4.47377	74.3188	-62.9924	-44.6666	41.2224	6.24104	134.34
MT4	MT	RT2	5	5	12.8597	3.58605	-2.72045	0.434641	12.6282	3.55361	4.36037	67.6645	-63.0346	-47.0847	41.8868	6.30302	148.192
MT5	MT	PreAQ	1	1	17.543	4.18844	-1.0646	0.0271873	13.0827	3.617	4.09558	77.6372	-50.6791	-20.5312	6.03906	3.54937	122.232
MT5	MT	PreAQ	2	2	16.8577	4.10581	-1.17874	0.0714195	13.8719	3.7245	4.10955	74.2789	-50.992	-23.428	2.59502	3.74456	121.287
MT5	MT	PreAQ	3	3	18.0163	4.24456	-1.28104	0.107564	14.034	3.7462	3.88682	76.5689	-45.149	-34.3563	9.29475	3.50392	136.236
MT5	MT	PreAQ	4	4	20.6495	4.54417	-1.31546	0.119077	13.3357	3.65181	3.95142	67.0416	-48.4118	-31.3237	9.61953	3.7145	148.509
MT5	MT	PreAQ	5	5	22.6865	4.76304	-1.39299	0.143947	12.5983	3.54941	3.67941	68.5931	-46.6347	-38.2139	8.49923	3.52324	123.275
MT5	MT	PostAQ	1	1	32.8453	5.73108	-1.34263	0.127956	18.2874	4.27637	3.62559	40.4835	-45.5451	-10.3618	23.6269	4.76034	141.546
MT5	MT	PostAQ	2	2	32.3498	5.68769	-1.07304	0.0306167	19.4219	4.40702	3.93164	68.6186	-52.0895	-0.325688	30.122	4.84357	167.587
MT5	MT	PostAQ	3	3	27.2541	5.22055	-1.32654	0.122721	18.0628	4.25003	3.70011	48.4634	-50.9419	-16.4799	26.4115	4.6665	164.352
MT5	MT	PostAQ	4	4	24.5374	4.95352	-1.20797	0.0820547	18.5965	4.31236	4.15623	58.8345	-47.7087	-12.1851	24.9233	4.8943	146.197
MT5	MT	PostAQ	5	5	24.1872	4.91805	-1.21065	0.0830179	18.4712	4.29781	4.19807	76.4863	-46.4446	-17.8926	25.2119	4.99436	123.989
MT5	MT	RT1	1	1	18.9378	4.35175	-1.525	0.18327	14.0056	3.74241	4.25922	63.5355	-46.5555	-30.416	32.0882	4.71471	247.374
MT5	MT	RT1	2	2	20.1406	4.48783	-1.45869	0.163962	16.3062	4.0381	4.27202	71.7492	-54.0984	-38.9464	37.2161	4.98687	219.704
MT5	MT	RT1	3	3	20.2907	4.50452	-1.22674	0.0887529	12.9605	3.60006	4.33703	61.8459	-56.927	-40.4957	39.6649	5.61293	223.392
MT5	MT	RT1	4	4	15.33	3.91535	-1.44606	0.160187	13.6281	3.69163	4.31733	65.0443	-55.1767	-39.9886	33.9219	5.41958	232.316
MT5	MT	RT1	5	5	22.3927	4.73209	-1.38907	0.142724	13.714	3.70324	4.40623	63.0931	-53.984	-34.384	35.5702	5.51063	227.094
MT5	MT	RT2	1	1	37.4493	6.11959	-1.38688	0.142039	14.225	3.77161	3.99405	71.2045	-45.3275	-25.6219	31.4841	4.71674	177.913
MT5	MT	RT2	2	2	32.888	5.73481	-1.31773	0.119828	14.3906	3.79349	3.77846	61.5594	-45.7112	-18.5648	29.8259	4.5411	204.415
MT5	MT	RT2	3	3	27.4308	5.23744	-1.18361	0.0732079	11.6639	3.41525	3.32532	50.283	-51.4001	-18.6566	26.9965	4.31529	204.484
MT5	MT	RT2	4	4	31.4697	5.60979	-1.28131	0.107656	12.928	3.59555	3.81742	71.5431	-63.5315	-15.3145	33.8082	4.97353	274.525
MT5	MT	RT2	5	5	32.1414	5.66934	-1.22659	0.088698	14.1574	3.76264	3.80723	70.9377	-53.3471	-13.4006	27.4338	4.16017	216.356
MT6	MT	PreAQ	1	1	54.2516	7.36557	-1.75092	0.243266	26.4339	5.14139	5.20147	121.815	-56.1371	-15.0591	20.8465	3.85178	118.66
MT6	MT	PreAQ	2	2	41.2202	6.4203	-1.90269	0.279368	21.7265	4.66117	4.27552	69.1393	-58.0579	-27.618	30.3748	4.86127	136.451
MT6	MT	PreAQ	3	3	46.5533	6.823	-1.68436	0.226435	22.0179	4.69233	4.74552	86.3668	-49.7593	-26.4505	28.1591	4.30483	153.818
MT6	MT	PreAQ	4	4	42.3328	6.50636	-1.51941	0.181676	22.1565	4.70707	5.0984	91.4955	-41.5856	-25.9192	26.3454	4.28076	190.747
MT6	MT	PreAQ	5	5	43.1455	6.56852	-2.05716	0.313269	23.9799	4.89693	5.16721	105.921	-44.1828	-28.2321	25.6626	4.64738	134.99
MT6	MT	PostAQ	1	1	39.7869	6.30769	-2.1519	0.332823	28.9366	5.37927	4.91016	101.267	-26.4463	-13.837	33.7029	4.42059	275.086
MT6	MT	PostAQ	2	2	39.9169	6.31798	-1.70181	0.230911	35.8167	5.9847	5.15857	96.305	-27.2469	-10.7733	24.2675	3.87384	231.828
MT6	MT	PostAQ	3	3	35.8084	5.98401	-1.9706	0.294599	32.6172	5.71114	5.24706	96.6312	-31.7667	-17.7407	38.3118	4.95572	225.46
MT6	MT	PostAQ	4	4	3.63	1.90526	-1.76664	0.247147	37.0118	6.08374	4.97616	99.6514	-33.4063	-11.6522	31.9518	4.54885	247.936
MT6	MT	PostAQ	5	5	26.7356	5.17064	-1.70412	0.231501	30.3828	5.51206	5.33584	95.4011	-33.644	-15.2862	34.3571	4.68027	224.666
MT6	MT	RT1	1	1	30.9172	5.56032	-1.84447	0.265871	35.785	5.98206	4.33178	88.2618	-31.6825	-24.5394	31.0174	4.79288	228.395
MT6	MT	RT1	2	2	33.6914	5.80443	-2.3297	0.3673	33.8257	5.81599	4.63902	96.7595	-35.6692	-20.8912	31.5023	4.02992	191.257
MT6	MT	RT1	3	3	36.1128	6.00939	-2.30617	0.362891	27.4257	5.23695	4.60332	95.2554	-49.5568	-28.5449	28.5795	4.7221	183.15
MT6	MT	RT1	4	4	27.6754	5.26074	-1.85032	0.267248	32.8125	5.72822	4.57128	80.4072	-30.9981	-18.4578	23.781	3.91267	190.44
MT6	MT	RT1	5	5	29.5359	5.4347	-2.03441	0.308439	35.1848	5.93167	4.7391	92.1462	-31.2451	-27.5543	29.421	3.90154	193.909
MT6	MT	RT2	1	1	21.5879	4.64628	-1.70853	0.232623	26.409	5.13897	4.73935	74.2249	-38.0715	-14.38	24.8466	3.61038	213.547
MT6	MT	RT2	2	2	24.7091	4.97083	-1.61892	0.209225	16.6607	4.08175	4.81926	76.6739	-53.7002	-15.4714	36.4895	4.07701	185.37
MT6	MT	RT2	3	3	25.0705	5.00705	-1.3781	0.13928	18.0596	4.24966	4.56527	72.6618	-42.2632	-16.7113	25.5352	3.59066	220.671
MT6	MT	RT2	4	4	21.3136	4.61667	-2.56146	0.408487	10.2791	3.20611	4.66561	69.3405	-44.6546	-13.5188	24.2253	4.36897	183.965
MT6	MT	RT2	5	5	29.1274	5.39698	-2.33192	0.367713	14.216	3.77041	4.67489	73.659	-46.3909	-15.8814	27.7685	4.60927	172.596
MT7	MT	PreAQ	1	1	27.8108	5.2736	-1.76504	0.246755	9.21617	3.03581	3.8822	61.7312	-34.7345	-25.9349	22.0655	3.6945	236.998
MT7	MT	PreAQ	2	2	26.4253	5.14055	-2.214	0.345178	11.054	3.32476	4.05436	69.2137	-41.3583	-26.0315	18.6552	3.74981	165.004
MT7	MT	PreAQ	3	3	29.1129	5.39564	-1.52199	0.182411	12.8234	3.58097	4.34631	68.4923	-34.33	-29.2195	21.6813	3.53265	177.033
MT7	MT	PreAQ	4	4	33.8593	5.81887	-1.29302	0.111605	12.2734	3.50334	4.33218	72.4891	-31.5278	-34.2017	20.4886	3.61673	213.382
MT7	MT	PreAQ	5	5	38.8997	6.23697	-1.60401	0.205207	12.2196	3.49566	4.2927	70.6046	-33.2419	-20.965	19.0953	3.49487	300.348
MT7	MT	PostAQ	1	1	17.7231	4.20989	-1.93378	0.286406	12.7577	3.57179	4.32377	69.1646	-36.2452	-32.6586	32.8759	4.17908	265.453
MT7	MT	PostAQ	2	2	27.6409	5.25746	-1.77828	0.249999	15.5328	3.94117	4.0457	63.014	-48.16	-24.2152	39.3795	5.09437	237.539
MT7	MT	PostAQ	3	3	12.7657	3.57291	-2.02155	0.305683	9.40814	3.06727	3.91978	72.4807	-42.1835	-27.1349	41.5256	5.44508	192.156
MT7	MT	PostAQ	4	4	27.6997	5.26305	-1.9611	0.292499	17.7592	4.21417	4.30487	74.5636	-42.4501	-36.8839	41.2717	5.00473	251.614
MT7	MT	PostAQ	5	5	22.0998	4.70105	-2.20393	0.343197	15.6628	3.95762	4.31902	72.884	-36.5871	-35.9348	38.1558	4.90971	261.249
MT7	MT	RT1	1	1	31.7179	5.63186	-2.37172	0.375064	21.8078	4.66989	4.77245	109.791	-29.0587	-20.5131	35.1643	4.61805	209.248
MT7	MT	RT1	2	2	25.7957	5.07894	-2.27249	0.356503	21.6952	4.65781	4.6049	106.214	-27.8455	-37.1699	37.4228	4.65468	229.708
MT7	MT	RT1	3	3	30.8917	5.55803	-2.559	0.40807	23.4905	4.8467	4.57993	107.184	-24.5869	-20.899	30.8224	4.34139	202.869
MT7	MT	RT1	4	4	38.3966	6.1965	-2.31629	0.364793	18.3697	4.28598	4.69962	96.7125	-28.9848	-24.2639	36.2286	4.35635	278.087
MT7	MT	RT1	5	5	28.5665	5.34476	-2.69917	0.43123	25.6544	5.06502	4.84298	103.286	-26.8848	-37.1395	32.2388	4.40925	228.537
MT7	MT	RT2	1	1	17.9074	4.23171	-1.87169	0.272234	11.7229	3.42388	3.72234	67.3184	-49.0533	-28.7026	31.353	5.21882	207.151
MT7	MT	RT2	2	2	24.4445	4.94414	-2.23871	0.349998	22.9602	4.79168	.	78.1266	-50.7409	-27.6908	34.483	5.57599	224.686
MT7	MT	RT2	3	3	.	.	.	.	22.179	4.70946	.	79.5213	-45.0155	-27.5142	36.7255	5.15586	230
MT7	MT	RT2	4	4	.	.	.	.	17.2923	4.1584	.	74.767	-47.7505	-38.7965	33.7243	5.20129	227.499
MT7	MT	RT2	5	5	.	.	.	.	25.0242	5.00242	.	82.7696	-58.582	-28.1923	30.1239	4.8086	202.028
MT8	MT	PreAQ	1	1	11.9575	3.45796	-0.996	-0.00174066	10.313	3.21139	2.70362	50.3015	-38.6191	-50.6103	21.2783	3.94155	154.241
MT8	MT	PreAQ	2	2	17.7556	4.21374	-0.779	-0.108463	12.1728	3.48895	3.2446	58.0707	-34.3948	-47.7075	18.1056	3.50465	153.253
MT8	MT	PreAQ	3	3	20.9938	4.58189	-0.886	-0.0525663	13.7465	3.70762	3.80031	68.1076	-29.4219	-49.0546	20.7775	3.52201	186.239
MT8	MT	PreAQ	4	4	16.5675	4.07032	-0.892	-0.0496351	13.0321	3.61	3.66645	67.6665	-33.1869	-40.7997	21.3379	3.68063	169.474
MT8	MT	PreAQ	5	5	20.5801	4.53652	-1.34281	0.128013	16.0952	4.01189	4.18268	71.1663	-27.3268	-56.6057	20.8072	3.54186	170.229
MT8	MT	PostAQ	1	1	15.9609	3.99511	-2.19349	0.341135	23.8223	4.8808	4.57729	91.6452	-29.0789	-40.7199	51.632	5.19293	226.844
MT8	MT	PostAQ	2	2	13.877	3.72518	-2.8996	0.462338	29.4552	5.42726	4.82353	99.5049	-29.7147	-26.9096	56.6821	5.53916	235.273
MT8	MT	PostAQ	3	3	23.5731	4.85521	-2.72644	0.435596	23.6478	4.8629	5.14751	71.0786	-24.4978	-32.9198	50.0223	5.50018	246.436
MT8	MT	PostAQ	4	4	17.4365	4.1757	-3.20006	0.505158	29.1024	5.39466	5.42622	111.238	-21.9069	-28.9751	47.0452	5.10338	242.595
MT8	MT	PostAQ	5	5	17.4082	4.17232	-2.76099	0.441065	38.9504	6.24103	5.65942	116.165	-24.6307	-20.5146	44.6557	4.9202	261.46
MT8	MT	RT1	1	1	36.4227	6.03512	-2.40373	0.380886	23.3079	4.82783	5.46873	73.763	-13.1931	-6.22142	47.0333	5.91975	300.082
MT8	MT	RT1	2	2	29.1111	5.39547	-2.0404	0.309714	25.8254	5.08187	5.38449	64.4982	-28.6069	-12.3709	44.9496	5.03378	252.492
MT8	MT	RT1	3	3	31.4406	5.60719	-2.48775	0.395807	25.4362	5.04343	5.33325	57.6166	-17.7692	-10.5256	40.6127	5.09355	315.384
MT8	MT	RT1	4	4	29.8084	5.45971	-2.45741	0.390477	25.0123	5.00123	5.31458	84.8716	-20.4978	-7.68619	40.5617	4.67094	363.195
MT8	MT	RT1	5	5	35.7891	5.9824	-2.72801	0.435845	26.4336	5.14137	5.79281	90.3439	-33.9529	-20.2914	0.000114345	5.42655	229.243
MT8	MT	RT2	1	1	29.4733	5.42893	-2.12177	0.326698	19.6787	4.43607	4.43367	49.6887	-36.0223	-16.3461	56.7195	6.02279	181.245
MT8	MT	RT2	2	2	33.1748	5.75976	-2.32101	0.365678	19.8914	4.45998	4.7587	48.9337	-29.4312	-18.1282	56.7833	5.99943	180.299
MT8	MT	RT2	3	3	30.4963	5.52235	-2.28992	0.35982	19.8678	4.45733	4.87866	63.2238	-18.211	-25.6172	52.1764	5.56557	215.004
MT8	MT	RT2	4	4	35.3128	5.94246	-2.40916	0.381866	19.6256	4.43008	5.12357	59.3277	-19.2511	-21.7906	48.7955	5.46944	230.074
MT8	MT	RT2	5	5	35.6195	5.96821	-2.52893	0.402937	19.9175	4.46291	4.78358	66.5752	-37.2889	-15.2616	53.6564	5.77431	175.647
ST1	ST	PreAQ	1	1	13.1544	3.6269	-1.75733	0.244854	14.9313	3.8641	3.4877	38.9667	-61.7281	-27.2222	16.0933	3.75897	76.2428
ST1	ST	PreAQ	2	2	20.7213	4.55207	-2.27647	0.357263	17.9681	4.23887	4.30961	65.1937	-64.6467	-29.8525	5.38298	3.76286	67.0757
ST1	ST	PreAQ	3	3	19.8505	4.45539	-2.58572	0.412582	16.4643	4.05762	4.08958	63.6647	-66.6229	-32.1323	13.5474	3.8143	60.5015
ST1	ST	PreAQ	4	4	22.2362	4.71553	-1.99928	0.300874	15.3953	3.92369	4.04081	62.098	-67.2623	-34.4346	15.9194	4.17211	52.8892
ST1	ST	PreAQ	5	5	8.0869	2.84375	-1.81724	0.259413	16.4977	4.06174	4.17207	56.5516	-65.4294	-33.6956	13.7032	4.52895	51.6826
ST1	ST	PostAQ	1	1	45.8518	6.7714	-2.30308	0.36231	24.0374	4.90279	4.71664	87.6567	-65.6515	-30.102	20.4391	4.57569	135.668
ST1	ST	PostAQ	2	2	37.749	6.14402	-2.20317	0.343048	23.0683	4.80295	4.65113	83.1196	-55.2976	-38.6257	20.2246	4.42399	155.735
ST1	ST	PostAQ	3	3	33.1866	5.76078	-3.23916	0.510433	25.1921	5.01918	4.852	75.3785	-64.4872	-23.0499	29.5312	5.46006	195.322
ST1	ST	PostAQ	4	4	27.2887	5.22386	-2.85211	0.455167	24.3036	4.92986	4.99854	90.7844	-67.41	-42.1388	23.9098	4.97246	144.956
ST1	ST	PostAQ	5	5	33.7881	5.81276	-2.92666	0.466373	27.0812	5.20396	5.07164	74.1062	-75.0709	-25.1409	25.1189	5.47605	150.182
ST1	ST	RT1	1	1	44.5569	6.67509	-2.89338	0.461405	19.723	4.44105	4.92542	50.1467	-63.3131	-43.0848	34.6424	5.1419	94.6862
ST1	ST	RT1	2	2	51.6588	7.1874	-3.00735	0.478184	24.2561	4.92504	4.87557	49.3521	.	.	.	5.97202	90.0463
ST1	ST	RT1	3	3	39.8806	6.31511	-3.17164	0.501283	24.5214	4.95191	4.96336	49.3678	-61.1105	-44.2956	37.9115	6.05068	91.3187
ST1	ST	RT1	4	4	40.9363	6.39815	-2.83819	0.453041	16.778	4.0961	5.04894	45.9522	-61.6831	-36.836	38.8475	5.67612	107.112
ST1	ST	RT1	5	5	45.4068	6.73846	-2.797	0.446692	20.199	4.49433	5.08847	52.4615	-53.2299	-39.017	38.5284	.	100.084
ST1	ST	RT2	1	1	56.1998	7.49665	-2.74308	0.438238	25.0919	5.00919	4.81594	62.8901	-64.9125	-26.4609	27.7143	5.38594	130.636
ST1	ST	RT2	2	2	55.883	7.47549	-2.96122	0.471471	21.9769	4.68795	5.00897	56.2024	-58.7657	-33.095	27.8806	4.76535	131.287
ST1	ST	RT2	3	3	45.3371	6.73328	-3.03545	0.482224	22.3436	4.72691	4.87586	48.9965	-66.2743	-35.9456	37.5871	6.20936	127.571
ST1	ST	RT2	4	4	48.2221	6.94422	-2.9321	0.467178	24.872	4.98718	4.96489	59.2158	-51.6964	-42.4556	33.5911	4.90125	153.483
ST1	ST	RT2	5	5	44.9742	6.70628	-2.80084	0.447288	26.2128	5.11984	5.17171	61.5117	-56.6992	-40.7002	32.6471	4.90268	146.295
ST2	ST	PreAQ	1	1	53.535	7.31676	-1.83941	0.264678	16.0894	4.01117	5.31496	90.9542	-73.174	17.677	47.2641	7.69262	142.13
ST2	ST	PreAQ	2	2	72.5284	8.51636	-3.94812	0.59639	19.8024	4.44999	6.27274	108.579	-72.813	-13.801	31.8383	7.47189	196.912
ST2	ST	PreAQ	3	3	68.0891	8.25161	-3.72424	0.571037	20.2653	4.5017	6.10045	91.5262	-70.056	-17.314	35.576	7.87775	193.664
ST2	ST	PreAQ	4	4	50.4976	7.10617	-3.18284	0.502814	12.1983	3.49261	5.69072	75.9103	-74.0297	-13.804	23.656	8.0468	169.956
ST2	ST	PreAQ	5	5	56.3515	7.50676	-4.35667	0.639155	18.4826	4.29913	6.68734	105.279	-72.8153	-16.208	32.2666	8.31054	125.541
ST2	ST	PostAQ	1	1	15.3241	3.9146	-1.67093	0.222959	33.1869	5.76081	.	92.7116	-31.5254	-16.2166	35.8414	6.17453	212.097
ST2	ST	PostAQ	2	2	14.8295	3.85091	-0.655115	-0.183682	16.063	4.00787	5.12922	78.3456	-25.8111	-5.95902	33.1024	5.97963	249.064
ST2	ST	PostAQ	3	3	25.6678	5.06634	-0.943327	-0.0253377	13.6532	3.69502	5.1397	84.123	-39.4717	-6.11083	34.7483	6.77304	193.237
ST2	ST	PostAQ	4	4	22.3882	4.73162	-0.805438	-0.0939679	18.15	4.26028	5.07918	81.9686	-30.8481	1.27034	51.9942	7.14488	202.894
ST2	ST	PostAQ	5	5	32.8657	5.73286	-2.96719	0.472345	16.1331	4.0166	5.36672	87.0557	-36.7043	-11.5622	42.8672	6.98824	272.186
ST2	ST	RT1	1	1	30.126	5.48872	-2.25027	0.352235	9.74261	3.12131	4.92446	87.6272	-25.5959	-5.69765	34.4386	6.45741	310.992
ST2	ST	RT1	2	2	27.1573	5.21126	-2.71459	0.433705	19.2085	4.38275	4.96336	70.7142	-25.821	-0.494302	31.2752	5.94473	342.513
ST2	ST	RT1	3	3	27.7878	5.27141	-2.59298	0.413799	16.1922	4.02395	5.01424	70.9436	-9.9894	-18.5428	29.2384	5.35522	265.948
ST2	ST	RT1	4	4	28.2029	5.31064	-2.18638	0.339725	18.8353	4.33997	5.01371	69.7703	-18.1049	-12.8241	29.0434	4.31048	218.458
ST2	ST	RT1	5	5	27.5804	5.25171	-3.12382	0.494686	11.2011	3.3468	5.30222	76.4644	-20.2721	-8.56717	40.6317	5.98209	361.378
ST2	ST	RT2	1	1	16.5561	4.06891	-3.20223	0.505453	16.4695	4.05827	5.38291	94.5587	-33.6169	-21.3753	39.3614	4.7996	299.215
ST2	ST	RT2	2	2	37.9075	6.1569	-3.04663	0.48382	22.6403	4.75818	5.49873	89.5545	-41.6719	-22.4042	29.9799	5.72765	244.399
ST2	ST	RT2	3	3	38.4838	6.20353	-2.90457	0.463081	15.8859	3.98572	5.29533	66.9882	-38.862	-6.89883	35.8098	5.96667	301.083
ST2	ST	RT2	4	4	45.1122	6.71656	-3.39917	0.531373	17.4673	4.1794	5.52011	70.7792	-35.8052	-1.45637	32.3121	5.30959	216.474
ST2	ST	RT2	5	5	45.3386	6.73339	-3.30618	0.519326	19.1501	4.37608	5.32403	93.2874	-42.4064	-15.6935	26.7745	4.35133	285.884
ST3	ST	PreAQ	1	1	18.2815	4.27569	-2.04453	0.310593	7.73824	2.78177	3.20185	53.7541	-69.4057	-19.4414	18.8384	4.71887	85.6327
ST3	ST	PreAQ	2	2	24.8716	4.98715	-1.91034	0.281112	14.4566	3.80218	4.09297	81.6659	-62.6635	-19.7242	22.3631	4.54712	133.852
ST3	ST	PreAQ	3	3	35.108	5.9252	-1.96165	0.292621	14.6866	3.8323	4.24197	83.1959	-59.4693	-21.7927	23.3573	4.25617	170.538
ST3	ST	PreAQ	4	4	32.5778	5.70769	-2.06833	0.315621	16.9914	4.12207	4.34737	89.4732	-64.4983	-19.8104	24.493	5.03118	129.619
ST3	ST	PreAQ	5	5	31.5685	5.61859	-2.10162	0.322554	18.1529	4.26063	4.64388	102.558	-66.7564	-22.4194	24.3055	5.02434	162.641
ST3	ST	PostAQ	1	1	44.3414	6.65893	-2.24004	0.350255	27.2183	5.21711	4.82482	110.94	-62.154	-10.2078	41.5278	5.82588	238.986
ST3	ST	PostAQ	2	2	46.61	6.82715	-2.76439	0.441599	26.2661	5.12505	4.77352	97.6154	-56.1699	-5.70787	45.095	6.24368	267.15
ST3	ST	PostAQ	3	3	45.4071	6.73848	-2.53531	0.404032	27.8434	5.27668	5.01614	106.94	-51.1783	-4.9819	41.78	6.04289	291.114
ST3	ST	PostAQ	4	4	43.1829	6.57137	-2.45845	0.390661	32.0604	5.66219	5.00143	105.387	-55.9377	-6.35377	39.7197	5.38884	222.704
ST3	ST	PostAQ	5	5	45.9768	6.78062	-2.70175	0.431645	28.7301	5.36005	5.01668	112.022	-44.6792	-2.02945	38.1961	4.08953	279.26
ST3	ST	RT1	1	1	31.75	5.63471	-2.358	0.372545	16.5308	4.06581	4.1313	72.3792	-68.1597	-1.80455	28.2452	4.46326	172.88
ST3	ST	RT1	2	2	39.9144	6.31778	-2.29196	0.360206	18.7569	4.33092	4.69425	89.4719	-64.2126	-12.5113	41.7265	5.46625	212.44
ST3	ST	RT1	3	3	33.9719	5.82854	-2.25589	0.353318	18.1463	4.25985	4.6553	90.9588	-67.7494	-5.89325	47.1662	5.87324	212.64
ST3	ST	RT1	4	4	27.23	5.21824	-2.7069	0.432472	19.8322	4.45333	4.49128	81.7097	-46.4314	-1.99842	34.5548	4.49967	254.649
ST3	ST	RT1	5	5	27.0511	5.20106	-2.35646	0.372261	21.1579	4.59977	4.47031	94.6585	-63.2893	-4.12163	38.7075	4.91995	230.586
ST3	ST	RT2	1	1	34.1722	5.8457	-2.30825	0.363283	19.6081	4.42811	4.5572	89.572	-47.75	-14.1458	32.9084	5.46255	166.911
ST3	ST	RT2	2	2	41.9602	6.47767	-2.53667	0.404264	24.0936	4.90853	4.69737	93.567	-51.9764	-8.19625	45.0841	6.22417	165.557
ST3	ST	RT2	3	3	38.2349	6.18344	-2.58953	0.41322	20.9701	4.57931	4.57205	78.9307	-47.878	-3.92111	38.6532	6.09404	79.3765
ST3	ST	RT2	4	4	40.2676	6.34568	-2.6706	0.426609	22.8364	4.77875	4.43438	95.634	-60.4396	-15.4583	35.5288	5.98407	110.329
ST3	ST	RT2	5	5	37.7839	6.14686	-2.46389	0.391621	19.7917	4.44878	4.61944	96.4456	-49.7335	-14.0984	40.676	6.46746	160.979
ST4	ST	PreAQ	1	1	35.7198	5.9766	-1.45232	0.162064	13.7451	3.70744	4.35847	81.4532	-40.1659	-23.0013	20.114	3.96907	102.873
ST4	ST	PreAQ	2	2	41.0224	6.40487	-1.74657	0.242185	13.6707	3.69738	4.81241	87.6866	-44.8313	-37.7485	20.0246	3.07817	182.466
ST4	ST	PreAQ	3	3	38.5915	6.21221	-1.42827	0.154811	15.9304	3.99129	4.39424	82.0332	-35.2296	-42.9731	19.07	2.95463	213.59
ST4	ST	PreAQ	4	4	43.9896	6.63247	-1.51594	0.180683	18.3069	4.27866	4.8967	96.5624	-46.7906	-33.9306	19.0486	3.20293	196.827
ST4	ST	PreAQ	5	5	42.9524	6.55381	-1.85167	0.267565	18.2614	4.27334	4.4517	81.1228	-45.5574	-35.2118	16.9905	3.26527	222.255
ST4	ST	PostAQ	1	1	12.2908	3.50583	-1.74486	0.24176	18.6894	4.32312	4.8589	88.9607	-12.4438	-26.0765	36.012	4.89335	305.812
ST4	ST	PostAQ	2	2	5.95684	2.44066	-1.8884	0.276094	16.6105	4.0756	4.63577	75.1094	-21.2629	-27.002	30.4519	4.50267	251.499
ST4	ST	PostAQ	3	3	8.14923	2.85469	-1.97867	0.296374	17.2754	4.15636	4.84321	71.72	-5.51007	-18.2616	32.0821	4.7541	271.798
ST4	ST	PostAQ	4	4	13.503	3.67464	-2.90416	0.463021	14.1552	3.76234	5.28497	72.3293	-8.30998	-20.5033	30.5475	4.66279	292.402
ST4	ST	PostAQ	5	5	25.0678	5.00678	-2.12171	0.326686	14.7029	3.83443	4.6433	75.288	-12.1262	-14.4425	28.843	4.13395	285.892
ST4	ST	RT1	1	1	6.35184	2.52029	-2.60806	0.416318	13.6573	3.69557	4.45537	60.754	-15.0137	-15.5907	31.468	4.87511	274.829
ST4	ST	RT1	2	2	15.8367	3.97954	-2.27565	0.357106	18.5005	4.30122	4.38626	58.2774	-14.6128	-15.5456	27.1669	4.46135	253.421
ST4	ST	RT1	3	3	25.7323	5.0727	-2.14016	0.330447	19.4268	4.40759	4.45635	63.9215	-16.65	-18.1259	31.7658	5.29608	247.135
ST4	ST	RT1	4	4	21.0021	4.5828	-2.3456	0.370254	17.1786	4.1447	4.57218	59.6577	-16.0927	-16.3265	25.0433	4.63013	301.148
ST4	ST	RT1	5	5	13.6159	3.68997	-2.08435	0.31897	15.0215	3.87575	4.37531	56.1852	-18.1944	-3.16803	26.3518	3.86405	304.692
ST4	ST	RT2	1	1	27.9142	5.28339	-1.464	0.165541	18.5817	4.31065	4.647	76.1158	-13.493	-16.5608	22.7718	3.61317	255.719
ST4	ST	RT2	2	2	33.2299	5.76454	-1.78222	0.25096	24.8272	4.98269	4.20989	68.8499	-10.8258	-20.972	37.1069	4.11356	238.911
ST4	ST	RT2	3	3	27.8106	5.27357	-1.45708	0.163483	21.1807	4.60225	4.64876	82.5362	-8.8707	-25.4951	41.8581	4.59298	304.68
ST4	ST	RT2	4	4	18.2499	4.27199	-1.58089	0.1989	22.237	4.71562	4.83605	83.3776	-12.8203	-6.74437	37.4917	4.66093	283.772
ST4	ST	RT2	5	5	20.6144	4.54031	-1.54926	0.190126	16.1661	4.02071	4.37021	68.9741	-12.796	-21.4382	37.278	4.60194	274.337
ST5	ST	PreAQ	1	1	13.2973	3.64655	-1.38533	0.141554	16.3337	4.0415	4.78938	78.2126	-53.0781	-18.9615	23.6509	4.61522	121.419
ST5	ST	PreAQ	2	2	18.1256	4.25742	-1.36994	0.136703	18.5279	4.30441	4.8549	79.6027	-44.467	-31.9132	33.8568	5.10139	150.256
ST5	ST	PreAQ	3	3	15.5051	3.93765	-2.34557	0.370248	19.574	4.42425	5.40151	54.0001	-45.1572	-14.4558	29.7013	4.62466	119.457
ST5	ST	PreAQ	4	4	13.7557	3.70887	-1.61481	0.208123	18.8611	4.34294	4.96808	75.7237	-50.5884	-20.8117	31.7744	4.56184	129.088
ST5	ST	PreAQ	5	5	16.1927	4.02401	-1.69575	0.229362	19.4677	4.41222	4.99609	77.14	-54.4377	-22.12	30.4394	5.0259	94.169
ST5	ST	PostAQ	1	1	19.1758	4.37902	-1.30182	0.11455	19.3152	4.3949	4.91088	70.4126	-55.456	-23.2035	25.5252	4.61618	110.205
ST5	ST	PostAQ	2	2	15.5811	3.9473	-1.35308	0.131324	14.7189	3.83652	4.33637	64.3448	-43.4526	-8.9792	25.7243	4.13614	115.818
ST5	ST	PostAQ	3	3	24.9882	4.99882	-1.27472	0.105414	19.0719	4.36714	4.8527	85.9428	-65.418	-16.759	20.5922	4.62467	50.3613
ST5	ST	PostAQ	4	4	16.6118	4.07576	-1.67854	0.22493	16.8808	4.10863	4.78878	78.9046	-49.9965	-17.6966	27.1161	4.51532	86.8478
ST5	ST	PostAQ	5	5	21.9309	4.68304	-1.35505	0.131955	21.6809	4.65628	4.79875	82.0689	-46.3107	-29.2848	35.2235	4.90558	146.566
ST5	ST	RT1	1	1	21.3166	4.61699	-1.309	0.11694	13.5261	3.67779	4.95058	77.212	-49.5366	-18.3981	35.7821	4.52254	131.076
ST5	ST	RT1	2	2	13.6084	3.68896	-1.4535	0.162414	12.7057	3.5645	4.60564	75.8709	-42.7527	-25.5945	40.8217	4.86549	132.196
ST5	ST	RT1	3	3	12.3556	3.51505	-1.91404	0.281951	13.7743	3.71138	4.69038	76.7599	-41.2865	-27.9038	33.8819	5.00558	124.884
ST5	ST	RT1	4	4	11.0634	3.32616	-1.9314	0.285872	12.5263	3.53925	4.75192	79.0719	-46.1819	-29.9937	31.2598	4.53201	129.661
ST5	ST	RT1	5	5	16.1817	4.02265	-1.9923	0.299355	15.463	3.9323	4.98351	87.5055	-46.1211	-25.3844	33.2906	4.80203	119.352
ST5	ST	RT2	1	1	14.587	3.81929	-1.60737	0.206115	12.1199	3.48136	4.53073	80.0667	-45.0791	-18.6064	31.4793	4.48895	129.741
ST5	ST	RT2	2	2	12.152	3.48598	-1.56245	0.193805	8.90125	2.9835	4.51894	73.6838	-39.5332	-32.2635	34.5105	4.44393	130.919
ST5	ST	RT2	3	3	6.13378	2.47665	-1.66602	0.22168	9.66898	3.1095	4.03064	85.4757	-32.758	-13.4975	30.123	4.24075	178.319
ST5	ST	RT2	4	4	9.58445	3.09588	-1.85291	0.267855	10.7653	3.28105	4.27161	87.0264	-35.789	-15.7861	24.8427	4.46608	141.716
ST5	ST	RT2	5	5	9.98673	3.16018	-1.26266	0.101287	12.0635	3.47325	4.5669	91.0246	-31.5303	-26.6671	32.9841	3.86373	135.513
ST6	ST	PreAQ	1	1	12.8938	3.59079	-1.0271	0.0116119	12.6313	3.55406	2.85158	58.2903	-49.0117	-26.6494	19.4206	3.85135	187.64
ST6	ST	PreAQ	2	2	4.46003	2.11188	-1.13163	0.0537045	13.3548	3.65443	3.1793	69.0022	-43.9698	-19.4213	24.9566	4.58333	250.39
ST6	ST	PreAQ	3	3	18.7559	4.33081	-1.07839	0.0327763	17.4402	4.17614	3.43636	83.551	-43.9857	-10.5323	20.7074	3.9003	253.694
ST6	ST	PreAQ	4	4	16.939	4.1157	-1.30997	0.11726	16.2024	4.02522	3.35349	74.537	-52.3559	-14.02	25.0843	4.66017	275.728
ST6	ST	PreAQ	5	5	20.2208	4.49675	-1.10333	0.0427066	15.2634	3.90684	2.9158	72.0552	-56.7785	-19.5199	25.217	4.81863	244.173
ST6	ST	PostAQ	1	1	36.987	6.0817	-2.57195	0.410263	19.8297	4.45306	3.70051	84.0718	-48.8885	-3.25872	44.1975	5.48137	356.465
ST6	ST	PostAQ	2	2	37.9118	6.15725	-2.7424	0.43813	18.8275	4.33907	3.81188	87.4487	-53.2308	-11.8771	47.5929	6.43119	352.399
ST6	ST	PostAQ	3	3	34.6415	5.8857	-2.28957	0.359754	17.4309	4.17503	3.57302	84.1884	-53.095	-0.029424	48.7694	6.25717	484.264
ST6	ST	PostAQ	4	4	27.6368	5.25708	-2.32083	0.365643	16.156	4.01945	3.46061	83.5768	-52.707	-6.44433	46.7006	5.76041	356.296
ST6	ST	PostAQ	5	5	25.2988	5.02979	-1.7908	0.253047	15.3308	3.91546	3.68698	75.1418	-55.3752	-6.41941	43.0823	6.79622	429.838
ST6	ST	RT1	1	1	10.4534	3.23318	-1.54419	0.188701	18.9123	4.34883	3.61014	77.4603	-47.6694	-26.6258	34.6195	5.11543	279.279
ST6	ST	RT1	2	2	20.8661	4.56794	-1.45186	0.161924	18.27	4.27434	3.40005	69.282	-45.3302	-20.9034	31.5494	4.46968	322.228
ST6	ST	RT1	3	3	16.358	4.0445	-1.52544	0.183396	18.4764	4.29842	3.92862	76.3097	-41.7333	-17.6082	24.6356	3.94861	254.849
ST6	ST	RT1	4	4	30.8974	5.55854	-1.49345	0.17419	17.7378	4.21163	3.71864	76.6187	-42.11	-20.0293	28.2828	4.9503	264.154
ST6	ST	RT1	5	5	26.2344	5.12195	-1.3676	0.135959	17.9974	4.24234	3.14065	72.4659	-39.02	-3.51276	33.0868	4.79273	395.849
ST6	ST	RT2	1	1	6.82737	2.61292	-1.38133	0.140296	18.5569	4.30777	4.17145	82.502	-36.5367	-12.6781	35.8185	4.69988	245.983
ST6	ST	RT2	2	2	13.3947	3.65988	-1.39331	0.144047	20.4501	4.52217	4.06205	86.6109	-44.6797	-18.9985	32.2455	5.52038	317.645
ST6	ST	RT2	3	3	18.6318	4.31646	-1.2495	0.0967345	19.8497	4.4553	3.90134	82.5721	-35.9716	5.7375	34.7508	5.07205	429.995
ST6	ST	RT2	4	4	8.74511	2.95721	-1.09361	0.0388641	21.4268	4.62891	4.66165	90.8449	-46.22	-10.5131	36.9596	5.57676	298.3
ST6	ST	RT2	5	5	11.747	3.42739	-1.61062	0.206994	19.8501	4.45534	4.62806	75.884	-41.0487	-2.18795	37.4934	5.52506	418.137
ST7	ST	PreAQ	1	1	17.1532	4.14165	-1.3742	0.138049	9.25058	3.04148	3.86037	58.5567	-32.1792	-27.3168	25.6924	4.25891	144.414
ST7	ST	PreAQ	2	2	18.3017	4.27805	-1.29507	0.112293	9.62916	3.10309	3.94948	64.8978	-31.4408	-35.551	22.2731	4.6344	148.12
ST7	ST	PreAQ	3	3	16.8003	4.09881	-1.08149	0.0340229	11.6803	3.41764	4.11095	69.12	-36.9322	-35.6694	23.1549	4.44185	133.251
ST7	ST	PreAQ	4	4	15.9196	3.98994	-1.09719	0.0402818	12.0588	3.47258	3.91523	69.6588	-43.7772	-38.5011	21.6492	4.9747	127.404
ST7	ST	PreAQ	5	5	18.5988	4.31264	-1.33753	0.126303	11.1643	3.34131	3.90381	65.2126	-45.523	-38.3809	20.0231	4.96117	112.801
ST7	ST	PostAQ	1	1	13.5991	3.6877	-1.63058	0.212342	12.4137	3.52332	4.69659	75.4926	-42.3396	-25.0899	29.6455	5.68305	164.981
ST7	ST	PostAQ	2	2	15.3066	3.91236	-1.66787	0.222163	13.1608	3.62778	4.46174	66.6717	-43.6662	-36.459	34.2648	6.2917	181.731
ST7	ST	PostAQ	3	3	11.8973	3.44924	-1.63399	0.213249	15.5561	3.94412	4.72346	66.0425	-37.8011	-39.1102	38.6867	5.72587	173.985
ST7	ST	PostAQ	4	4	16.5144	4.06379	-2.49139	0.396442	16.1282	4.01599	4.7104	66.1867	-41.7437	-38.5053	39.0027	6.0775	166.794
ST7	ST	PostAQ	5	5	15.2482	3.9049	-2.837	0.45286	12.1434	3.48474	4.55868	45.9757	-41.7951	-26.4844	40.5458	6.09175	198.035
ST7	ST	RT1	1	1	19.1631	4.37756	-1.78478	0.251586	8.04527	2.83642	4.30334	59.4919	-42.0465	-25.3004	28.5217	4.07073	187.023
ST7	ST	RT1	2	2	20.544	4.53255	-1.79607	0.254323	7.07041	2.65902	4.36232	62.7544	-41.4675	-30.7666	31.5178	4.82458	193.895
ST7	ST	RT1	3	3	16.9789	4.12054	-1.81367	0.258557	7.68973	2.77304	4.36318	64.1887	-44.6088	-27.1516	31.4377	4.98086	184.966
ST7	ST	RT1	4	4	15.2951	3.91089	-2.03221	0.307968	8.31989	2.88442	4.31954	63.1814	-45.1639	-27.3482	33.9215	5.4501	158.435
ST7	ST	RT1	5	5	9.33969	3.05609	-2.72487	0.435345	7.25641	2.69377	4.34792	40.9862	-42.2355	-26.9396	28.4742	4.78775	178.995
ST7	ST	RT2	1	1	10.8648	3.29619	-2.02852	0.307179	9.16009	3.02656	4.06798	61.887	-42.7559	-29.6205	30.7413	4.57833	172.549
ST7	ST	RT2	2	2	12.5946	3.54889	-2.17228	0.336916	8.01911	2.8318	4.17469	52.124	-50.3671	-22.3832	29.067	4.43897	143.544
ST7	ST	RT2	3	3	11.0039	3.31721	-2.06726	0.315395	5.64638	2.37621	4.14272	55.8481	-49.4962	-20.8028	26.7974	5.23206	157.873
ST7	ST	RT2	4	4	8.99498	2.99916	-1.89185	0.276887	6.59791	2.56864	3.86926	54.4068	-52.669	-18.2688	26.0681	5.18866	157.501
ST7	ST	RT2	5	5	9.81809	3.13338	-2.04484	0.310658	6.26084	2.50217	4.02424	57.3399	-49.9347	-13.9153	29.3944	4.86372	183.953
ST8	ST	PreAQ	1	1	16.2795	4.03478	-1.02146	0.00922009	12.4189	3.52405	3.88524	46.0897	-61.0773	-19.5541	20.2933	4.66755	120.915
ST8	ST	PreAQ	2	2	19.0537	4.36505	-1.07666	0.0320786	12.2692	3.50274	3.96827	49.738	-52.3184	-25.2754	16.7489	4.81057	119.906
ST8	ST	PreAQ	3	3	18.5418	4.30602	-0.923562	-0.0345339	15.4661	3.93269	4.20214	54.8114	-60.0289	-21.3426	23.1725	5.22453	127.029
ST8	ST	PreAQ	4	4	26.4668	5.14459	-1.107	0.0441476	15.1332	3.89014	4.12117	49.5914	-58.1709	-18.5521	19.1326	5.33052	129.987
ST8	ST	PreAQ	5	5	18.5646	4.30866	-1.24745	0.0960235	12.7607	3.57221	3.94501	43.9557	-60.3746	-22.7194	21.098	4.91368	123.923
ST8	ST	PostAQ	1	1	23.5651	4.85439	-1.49201	0.173771	17.3138	4.16099	3.87542	65.1812	-67.7495	-19.1989	32.0299	5.28644	146.126
ST8	ST	PostAQ	2	2	23.1746	4.814	-1.98379	0.297495	18.4526	4.29565	4.20603	55.1304	-63.793	-22.3526	35.1509	5.6728	146.453
ST8	ST	PostAQ	3	3	19.5254	4.41876	-1.70407	0.231488	15.5719	3.94612	4.24625	55.7002	-62.2517	-10.5408	33.399	5.50631	162.459
ST8	ST	PostAQ	4	4	23.7433	4.87271	-1.96272	0.292859	18.7302	4.32785	4.32132	60.6172	-66.7788	-18.5097	29.9143	4.81442	139.892
ST8	ST	PostAQ	5	5	21.2241	4.60696	-1.72437	0.23663	18.1683	4.26243	4.26678	60.5178	-64.5124	-20.9979	33.6346	5.32748	143.825
ST8	ST	RT1	1	1	10.1995	3.19366	-1.53626	0.186464	18.9196	4.34967	3.93633	56.8959	-62.7806	-15.4441	28.1441	5.08172	132.771
ST8	ST	RT1	2	2	8.32606	2.88549	-1.803	0.255996	18.1137	4.25602	4.29794	57.8678	-58.2056	-13.6576	28.8134	5.10127	151.188
ST8	ST	RT1	3	3	16.2371	4.02953	-2.06893	0.315747	13.7909	3.71361	3.91316	57.43	-65.706	-15.4854	29.0099	4.90074	130.425
ST8	ST	RT1	4	4	17.4149	4.17312	-1.704	0.23147	21.6205	4.64978	4.29026	55.0891	-62.7183	-10.5638	29.3014	5.13586	144.98
ST8	ST	RT1	5	5	13.1901	3.63182	-1.609	0.206556	18.3069	4.27866	4.34935	58.2953	-59.1346	-10.6217	28.9178	4.66003	158.739
ST8	ST	RT2	1	1	17.81	4.2202	-1.72872	0.237724	13.7708	3.71091	4.19668	68.3024	-51.0143	-34.0912	30.6514	4.87178	117.286
ST8	ST	RT2	2	2	18.99	4.35776	-1.622	0.210051	11.3399	3.36747	4.27381	66.7515	-49.794	-24.821	30.9666	4.5167	139.981
ST8	ST	RT2	3	3	19.9992	4.47205	-1.501	0.176381	10.7763	3.28273	4.53659	66.3344	-55.3877	-18.2718	33.9269	4.94209	140.189
ST8	ST	RT2	4	4	21.3102	4.61629	-1.613	0.207634	11.0624	3.32602	4.38118	68.1939	-57.2164	-14.8789	33.019	5.16258	131.608
ST8	ST	RT2	5	5	20.2675	4.50195	-1.523	0.1827	14.5817	3.8186	4.49915	63.2973	-58.0158	-15.7632	27.0956	5.56603	109.254
