# Supplementary material for: The effects of single versus multiple training sessions on the motor learning of two Krav Maga strike techniques, in women
Source: PeerJ. 2020 Feb 13;8:e8525. doi: 10.7717/peerj.8525 (PMC7024584; doi:10.7717/peerj.8525)
Supplement: Supplemental Information 2 [file peerj-08-8525-s002.xlsx]

## Sheet: Sheet1
	Straight Punch Technique
	Checkpoint / Component:	Movement Description	Events and Performance Measures for Component Analysis
	(1) Straight / Arm Abduction	The elbow is maintained tucked in close to the side of the body, pointed towards the ground and extends as the fist travels forward towards the target during the punch. The shoulder is adducted horizontally throughout the movement until contact with target is made. The first and second metacarpal knuckles of the fist contact the target while externally rotated at about 45 degrees from horizontal …	Event 1: IN	Initiation of hand movement indicated by first instance of positive hand velocity in the anterior-posterior direction towards the target.
			Events 2: P CON	Peak contact with target indicated by peak force on force cube in the anterior-posterior direction.
			Measure:	Amount of arm abduction about the shoulder joint in degrees between events.
	(2) Recoil / Peak Recoil Velocity	The fist is recoiled immediately and rapidly after contact with target.	Event 1: P CON	Peak contact with target indicated by peak force on force cube in the anterior-posterior direction.
			Event 2: END	End of punch recoil indicated when the hand stops moving back towards the body in the anterior-posterior direction.
			Measure:	Peak velocity value of fist recoil between events.
	(3) Push / Peak Anterior GRF	The posterior foot pushes forcefully backward, along the A/P axis, away from the target during the initiation of the punch.	Event 1: IN	Initiation of hand movement indicated by first instance of positive hand velocity in the anterior-posterior direction towards the target.
			Event 2: P CON	Peak contact with target indicated by peak force on force cube in the anterior-posterior direction.
			Measure:	Peak anterior GRF.
	Defensive Kick Technique
	(1) Knee Lift / Thigh-Thorax Flexion	The dorsi flexed foot and flexed knee of the kicking leg is lifted in front (anteriorly and vertically) of the participant as high and as close to the chest as possible, where the relative joint angle, created between the thigh and thorax segments, exhibits flexion at an angle occurring at a minimum of less than 90 degrees of flexion.	Event 1: IN	Initiation of foot movement indicated by first instance of positive foot velocity in the anterior-posterior direction towards the target.
			Event 2: P CON	Peak contact with target indicated by peak spike in force on the force cube in the anterior-posterior direction.
			Measure:	Maximum thigh-thorax flexion about the thigh-thorax joint in degrees between events.
	(2) Knee Extension / Knee Extension	The leg and hip are extended forward and horizontally adducted until the sole of the foot makes contact with the target, with an emphasis on extension of the knee, while adducted horizontally before, during and after contact with target is made.	Event 1: P CON	Peak contact with target indicated by peak spike in force on the force cube in the anterior-posterior direction.
			Event 2: POST CON	End of foot contact with target indicted by zero impact reaction force on the force cube in the anterior-posterior direction.
			Measure:	Greatest extension angle about the knee joint in degrees between events.
	(3) Push / Peak Anterior GRF	The posterior foot pushes forcefully backward, along the A/P axis, away from the target during the initiation of the kick.	Event 1: IN	Initiation of foot movement indicated by first instance of positive foot velocity in the anterior-posterior direction towards the target.
			Event 2: POST CON	Peak contact with target indicated by peak spike in force on the force cube in the anterior-posterior direction.
			Measure:	Peak anterior GRF.
