# Supplementary material for: The effects of single versus multiple training sessions on the motor learning of two Krav Maga strike techniques, in women
Source: PeerJ. 2020 Feb 13;8:e8525. doi: 10.7717/peerj.8525 (PMC7024584; doi:10.7717/peerj.8525)
Supplement: Supplemental Information 4 — Baseline assessment - immediately before initial training sessions; Reassessment #1 (RT1) - immediately after initial training session; Reassessment #2 (RT2) - 5 days after RT1; Reassessment #3 (RT3) - 7 days after RT2. Light-shade is significantly different from no-shade, and dark-shade is significantly different from both light-shade and no-shade. Significance level set to p < 0.05. [file peerj-08-8525-s004.xlsx]

## Sheet: Sheet1
		Timepoint
		Baseline			RT1			RT2			RT3
	Straight Punch
	Arm abduction ROM (°)	25	±	3	24.5703	±	2.04813	26.5506	±	2.228	25.3356	±	2.74206
	Hand recoil Velocity (m/s)	-1.74289	±	0.154341	-2.15471	±	0.127453	-2.33725	±	0.179215	-2.2159	±	0.178308
	Peak anterior GRF (%BW)	14.6097	±	0.848834	20.3373	±	1.44783	19.2516	±	1.57687	17.6042	±	1.30817
	Peak impact force (%BW)	74.463	±	3.75297	80.1898	±	3.60346	76.8705	±	4.64931	75.57	±	3.79306
	Peak Strike Velocity (m/s)	4.33476	±	0.183928	4.6174	±	0.131358	4.57389	±	0.130951	4.49339	±	0.123393
	Defensive Kick
	Thigh-Thorax flexion angle (°)	-51.5917	±	3.02803	-43.4603	±	3.80391	-41.6472	±	3.59138	-42.6857	±	3.31631
	Knee extension angle (°)	-28.1294	±	2.50564	-21.1101	±	2.4284	-18.6805	±	2.70434	-20.1108	±	2.23359
	Peak anterior GRF (%BW)	20.9778	±	1.69564	34.3198	±	1.99201	32.9632	±	1.11392	34.7164	±	1.68614
	Peak impact force (%BW)	153.516	±	11.8228	219.958	±	16.4231	224.997	±	17.3995	212.012	±	16.5837
	Peak Strike Velocity (m/s)	4.51935	±	0.252849	5.27551	±	0.16433	5.03824	±	0.125009	5.2392	±	0.187849
